# Supplementary material for: Synthesis and polymerization of a new hydantoin monomer with three halogen binding sites for developing highly antibacterial surfaces
Source: Royal Society of Chemistry journal article supplement (doi:10.1039/c8nj02743a), 2018-01-01
Supplement: c8nj02743a1.pdf [file c8nj02743a1.pdf]

## Supplementary information

### Synthesis and Polymerization of a New Hydantoin Monomer With Three Halogen Binding Sites for the Development of Highly Antibacterial Surfaces

*Rajani Kant Rai and A. Jayakrishnan, Department of Biotechnology, Bhupat and Jyothi Mehta School of Biosciences, Indian Institute of Technology Madras, Chennai 600 036, Tamil Nadu, India.*

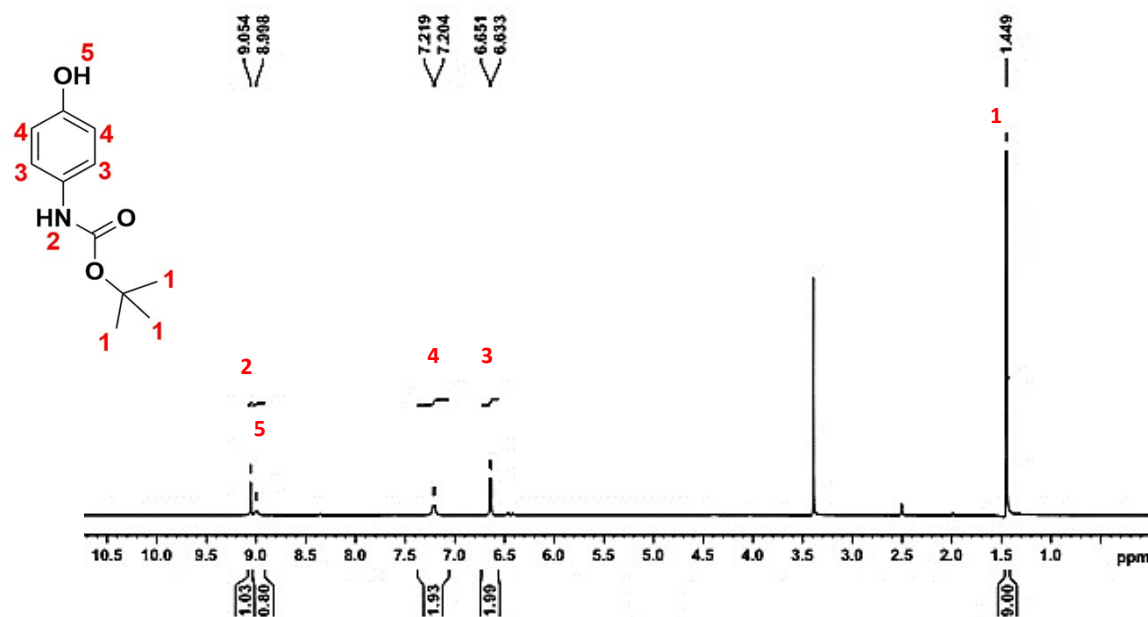

Fig S1. <sup>1</sup>H NMR of tert-butyl(4-hydroxyphenyl)carbamate (TBHC)

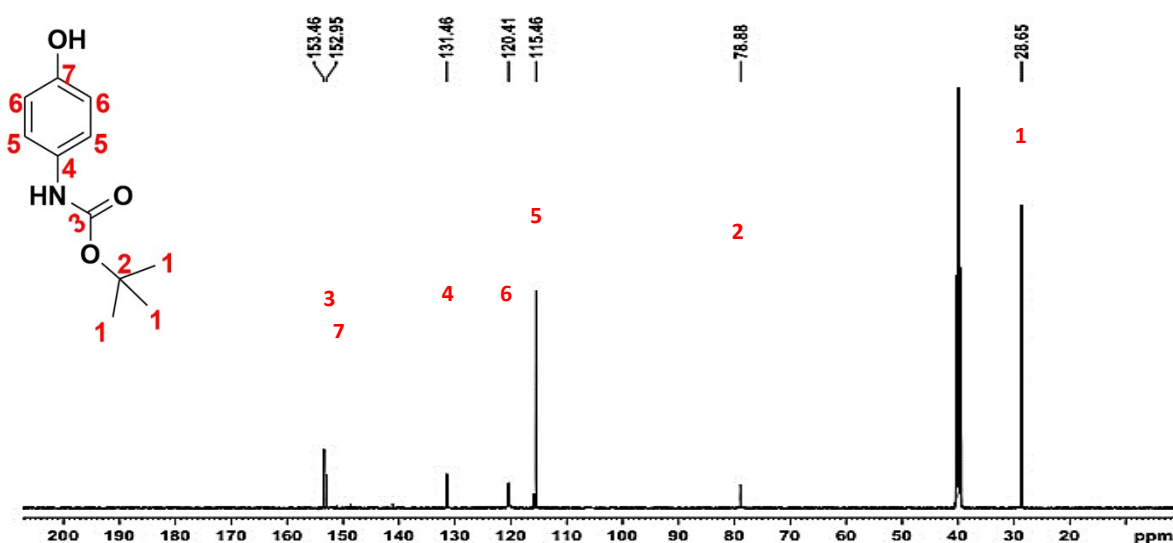

Fig S2. <sup>13</sup>C NMR of tert-butyl(4-hydroxyphenyl)carbamate (TBHC)

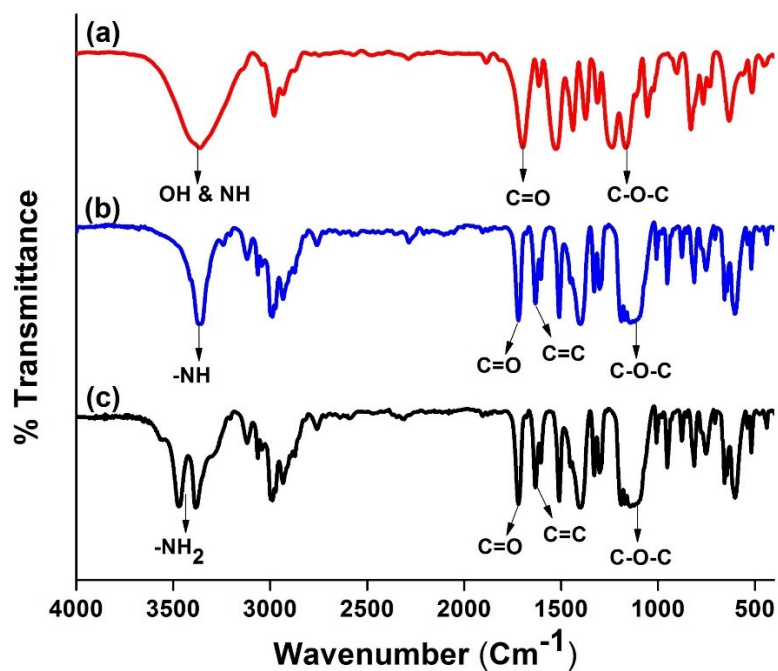

Fig S3. FTIR Spectra of TBHC (a), TBPM (b) and APM (c)

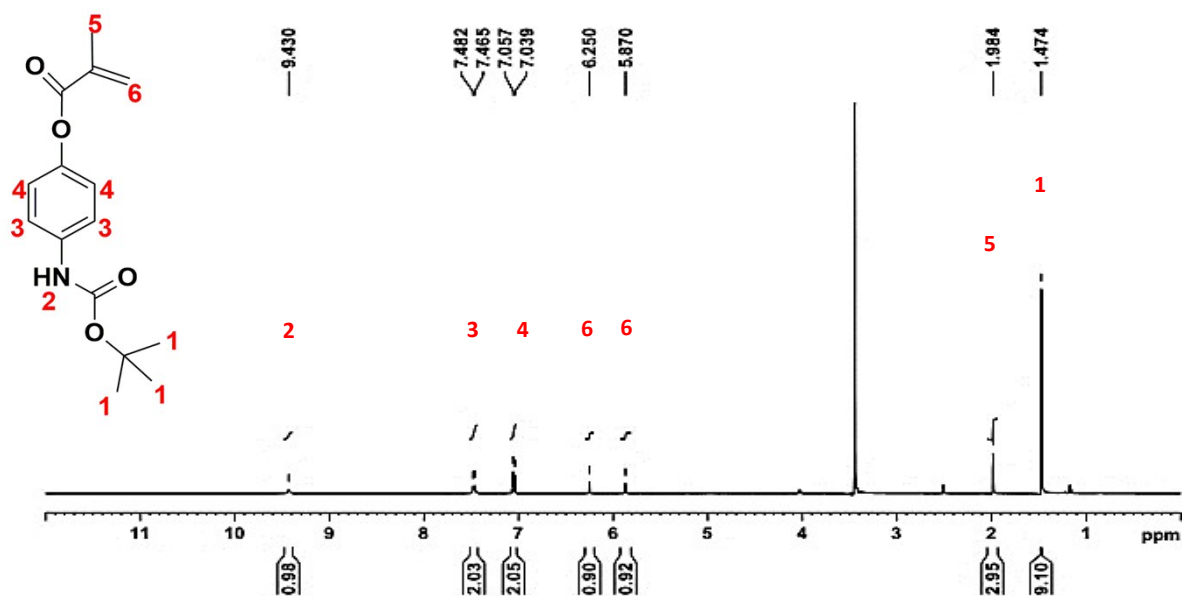

Fig S4. <sup>1</sup>H NMR of 4-((tert-butoxycarbonyl)amino)phenyl methacrylate (TBPM)

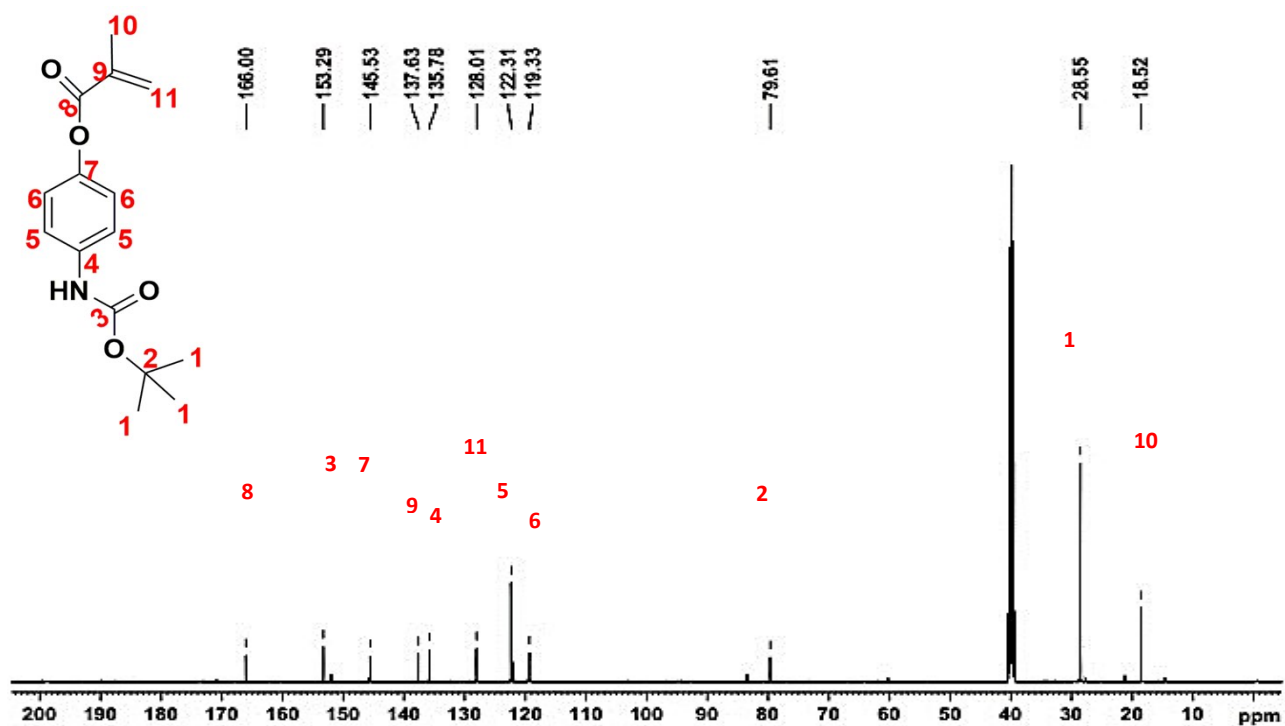

Fig S5. <sup>13</sup>C NMR of 4-((tert-butoxycarbonyl)amino)phenyl methacrylate (TBPM)

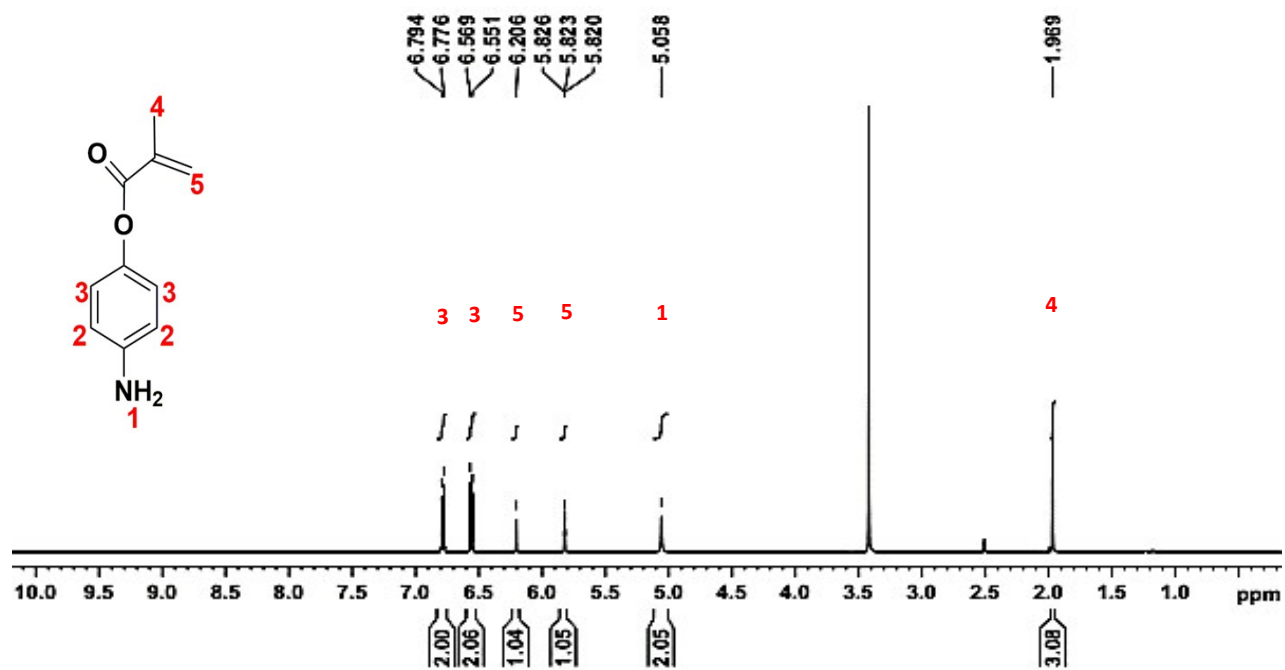

Fig S6. <sup>1</sup>H NMR of 4-aminophenyl methacrylate (APM)

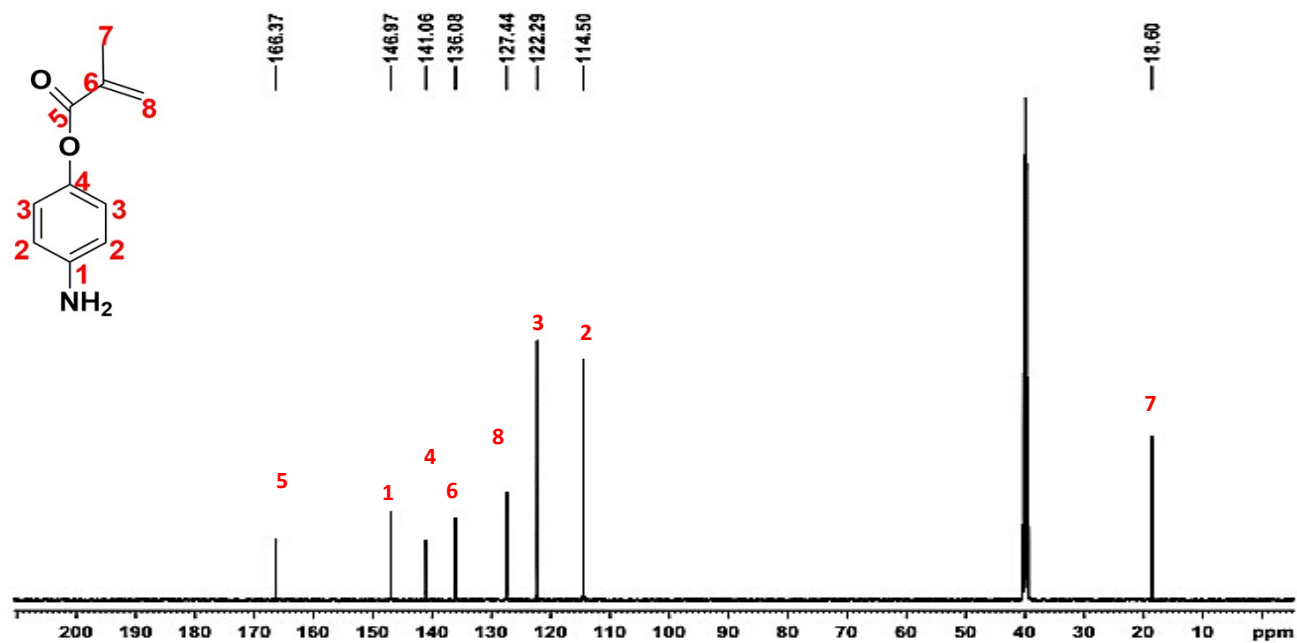

Fig S7. <sup>13</sup>C NMR of 4-aminophenyl methacrylate (APM)

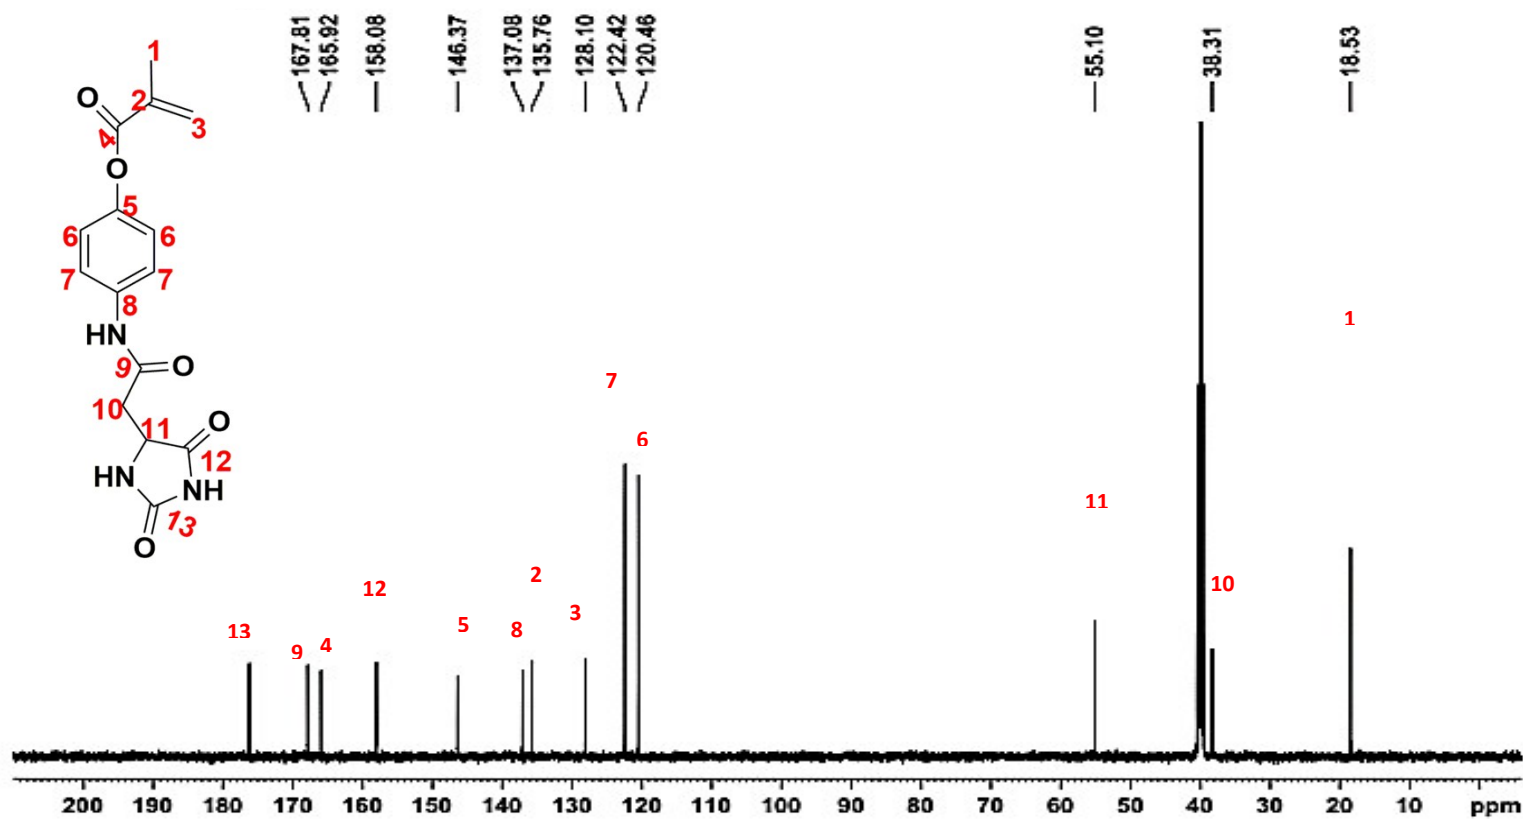

Fig S8. <sup>13</sup>C NMR of 4-(2-(2,5-dioximidazolidin-4-yl acetamido)phenyl) methacrylate (DAPO)

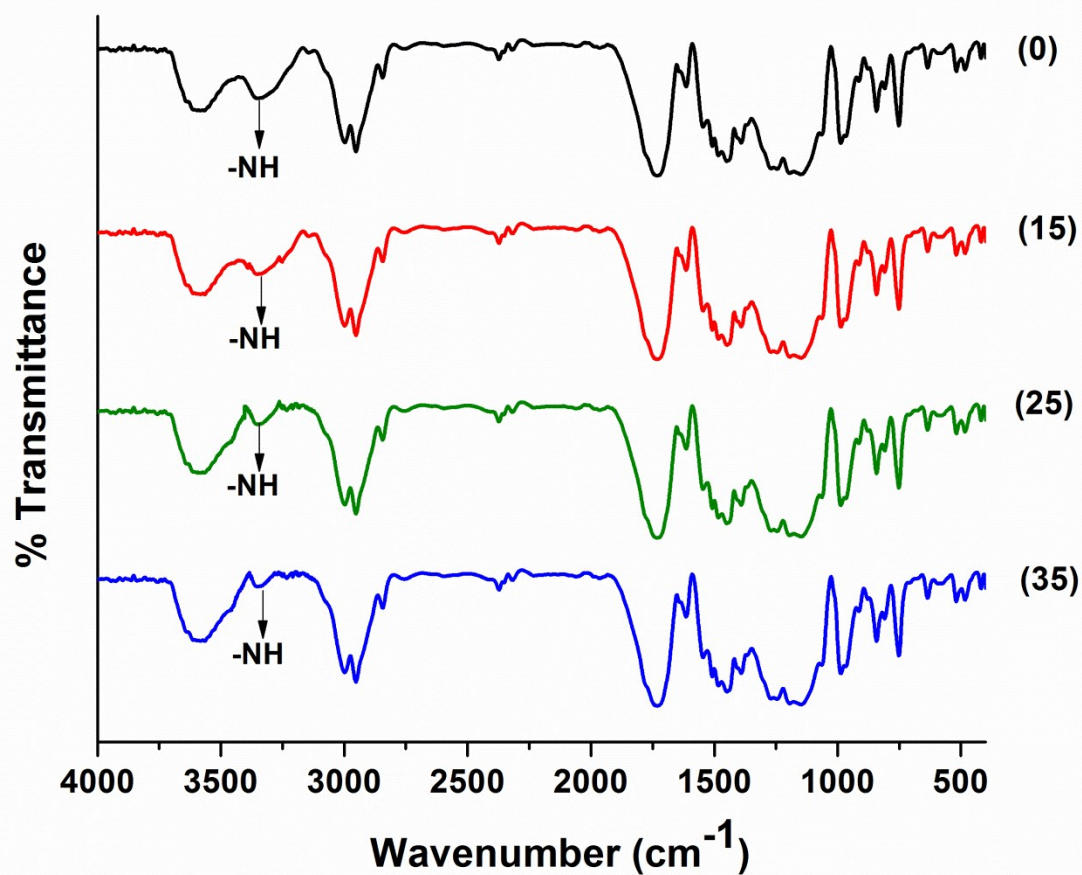

Fig S9. ATR-FTIR Spectra of poly(DAPO-co-MMA) film before (0) and after (15), (25) and (35) washes.

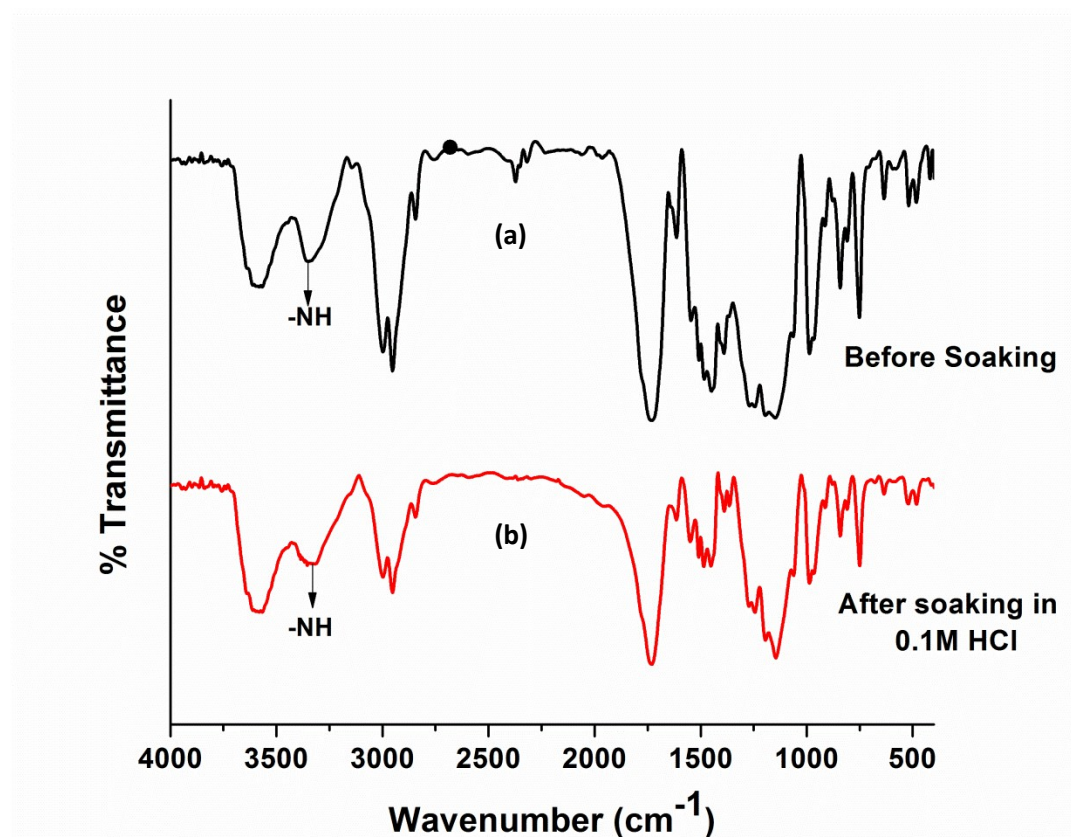

**Fig S10.** ATR-FTIR Spectra of poly(DAPO-co-MMA) film before soaking (a) and after soaking for 24 h in 0.1M HCl (b) .
